# Supplementary material
Source: ML conference proceedings conference paper supplement (https://proceedings.neurips.cc/paper_files/paper/2022/hash/12d286282e1be5431ea05262a21f415c-Abstract.html)
Supplement: Supplementary file 1 [file 12d286282e1be5431ea05262a21f415c-Supplemental-Conference.zip]

Archive with 2 entries (2 files):
- neurips_2022_appendix.pdf
- __MACOSX/._neurips_2022_appendix.pdf
